# Supplementary material
Source: publisher figshare collection journal article supplement (https://acs.figshare.com/ndownloader/files/22116786)
Supplement: Supplementary file 1 [file 22116786]

# Growth of the phase change enthalpy induced by the crystal transformation of an inorganic-organic eutectic mixture of magnesium nitrate hexahydrate-glutaric acid

*Suimin Li<sup>a</sup>, Shao Lin<sup>a</sup>, Ziyi Ling<sup>a,b\*</sup>, Xiaoming Fang<sup>a,b</sup>, Zhengguo Zhang<sup>a,b\*</sup>*

<sup>a</sup> Key Laboratory of Enhanced Heat Transfer and Energy Conservation, The Ministry of Education, School of Chemistry and Chemical Engineering, South China University of Technology, Guangzhou 510640, China.

<sup>b</sup> Guangdong Engineering Technology Research Center of Efficient Heat Storage and Application, South China University of Technology, Guangzhou 510640, China.

E-mail: [zyiling@scut.edu.cn](mailto:zyiling@scut.edu.cn) ; [cezhang@scut.edu.cn](mailto:cezhang@scut.edu.cn)

Tel.: +86 20 8711 2845; Fax: +86 20 8711 3870

## 1. Uncertainties calculation of DSC

Type A uncertainty is the statistical uncertainty component, calculated by the equation given as Eq. (1):

$$\mu_A = \sqrt{\frac{\sum(x_i - \bar{x})^2}{(n-1)n}} \quad (1)$$

Where,  $\mu_A$  is the Type A uncertainty,  $x_i$  is the experimental value for each time,  $\bar{x}$  is the average of all values, n is the number of experiment times.

Type B uncertainty is the non-statistical uncertainty component, usually dependent on the instrument error and calculated by the equation given as Eq. (2):

$$\mu_B = \frac{\Delta_{\text{instrument}}}{\sqrt{3}} \quad (2)$$

Where,  $\mu_B$  is the Type B uncertainty,  $\Delta_{\text{instrument}}$  is the instrument error. The uncertainty of the DSC in T and  $\Delta H$  correspond to 1.0 °C and 2.0 %.

The final uncertainty is calculated by  $\mu_A$  and  $\mu_B$  according to the equation given as Eq. (3):

$$\mu = \sqrt{\mu_A^2 + \mu_B^2} \quad (3)$$

The uncertainties calculation results are shown in Table 1 and Table 2.

**Table 1** The uncertainties of MNH- GA binary in melting point and the melting enthalpy.

| wt% | T <sub>m</sub> /°C | ΔH <sub>m</sub> /(J·g <sup>-1</sup> ) | μ <sub>ΔHm</sub> /% |
|-----|--------------------|---------------------------------------|---------------------|
| 100 | 89.9±0.6           | 165.2±3.7                             | 2.2                 |
| 70  | 67.3±0.6           | 176.6±4.3                             | 2.4                 |
| 65  | 66.5±0.6           | 179.4±5.5                             | 3.1                 |
| 60  | 66.7±0.6           | 189.0±2.3                             | 1.2                 |
| 55  | 67.0±0.6           | 186.5±3.7                             | 2.0                 |
| 50  | 66.9±0.6           | 186.9±3.7                             | 2.0                 |
| 40  | 65.9±0.9           | 193.8±2.6                             | 1.3                 |
| 0   | 97.3±0.7           | 175.3±4.2                             | 2.4                 |

**Table 2** The uncertainties of MNH- GA, MNH- GA/EG and MNH- GA/EP in melting point and the melting enthalpy before and after cycling.

| Samples                              | $T_m/^{\circ}\text{C}$ | $H_m/(\text{J}\cdot\text{g}^{-1})$ | $\mu_{\Delta H_m}/\%$ |
|--------------------------------------|------------------------|------------------------------------|-----------------------|
| MNH-GA                               | $66.7\pm0.6$           | $189.0\pm2.3$                      | 1.2                   |
| MNH-GA/EG                            | $63.5\pm0.7$           | $75.7\pm3.4$                       | 4.5                   |
| MNH-GA/EP                            | $65.1\pm0.6$           | $102.3\pm7.3$                      | 7.1                   |
| MNH-GA/EP-without cover (100 cycles) | $63.3\pm0.6$           | $59.9\pm3.5$                       | 5.9                   |
| MNH-GA/EP-with cover (100 cycles)    | $62.3\pm0.6$           | $100.0\pm1.6$                      | 1.6                   |

## 2. Video recording of crystallization process

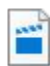

Supplementary  
Information.mp4

**Video 1** The crystallization process video of 60 wt% MNH-GA eutectic mixture.
